# Supplementary material
Source: Springer Nature journal article supplement (https://www.springermedizin.de/resource/supplementary/12885_2011_2867_MOESM4_ESM.pdf/9462186)

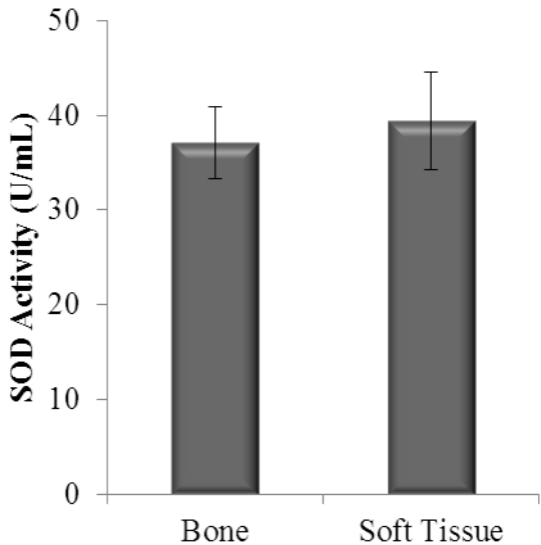

Supplement: MOESM4 [file 9462186]
